# Supplementary material for: Transcriptional, epigenetic and metabolic signatures in cardiometabolic syndrome defined by extreme phenotypes
Source: PubMed Central journal article supplement (PMC8917653; doi:10.1186/s13148-022-01257-z), 2022-03-12
Supplement: 13148_2022_1257_MOESM2_ESM.pdf [file 13148_2022_1257_MOESM2_ESM.pdf]

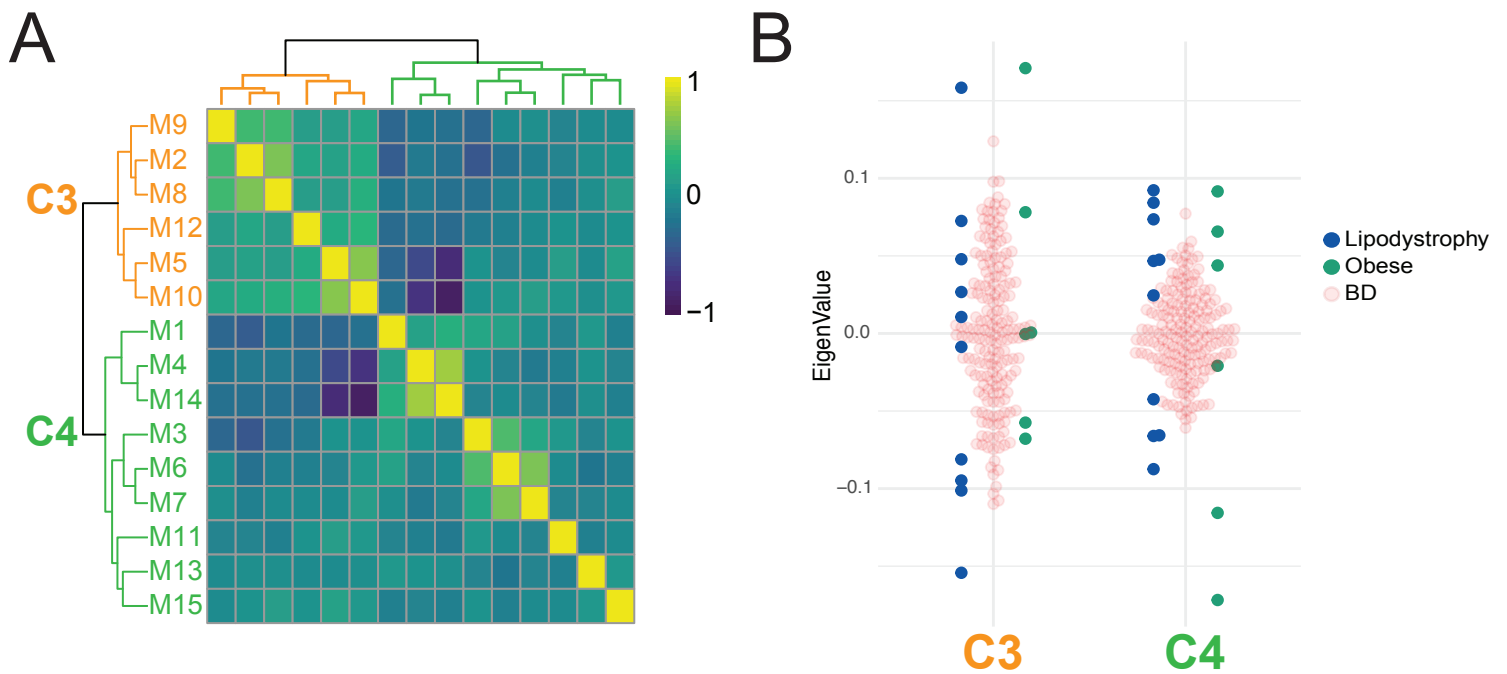

**Supplementary figure 2 - Related to Figure 1 - WGCNA analysis with BD individuals metabolite values and cluster functional annotation.**

A. Heatmap of BD individuals eigen-metabolites adjacencies in the consensus eigen-metabolites network. Each row and column correspond to one eigen-metabolite (labeled by consensus module color). The heatmap is color-coded by adjacency, yellow indicating high adjacency (positive correlation) and blue low adjacency (negative correlation) as shown by the color legend. B. Beeswarm plot using average eigen-metabolites per cluster. Colors indicate cohorts.
